# Supplementary material
Source: publisher figshare collection journal article supplement (https://acs.figshare.com/ndownloader/files/3710443)
Supplement: Supplementary file 1 [file 3710443]

# Supplementary Information

## Synthesis of $(\text{Ga}_{1-x}\text{Zn}_x)(\text{N}_{1-x}\text{O}_x)$ with Enhanced Visible-Light Absorption and Reduced

## Defects by Suppressing Zn Volatilization

Dennis P. Chen and Sara E. Skrabalak\*

### Table of Contents

|                                                                                                                                                                       |      |
|-----------------------------------------------------------------------------------------------------------------------------------------------------------------------|------|
| FTIR spectrum of ZnGa-LDH (Figure S1)                                                                                                                                 | S2   |
| Assignment of the main IR vibration modes of ZnGa-LDH (Table S1)                                                                                                      | S2   |
| Pawley refinement of ZnGa-LDH high resolution synchrotron XRD data (Figure S2)                                                                                        | S3   |
| STEM micrographs/EDS-mapping of GZNO-NH <sub>3</sub> and GZNO-O <sub>2</sub> /NH <sub>3</sub> (Figure S3)                                                             | S4   |
| Reaction time studies of GZNO-NH <sub>3</sub> and GZNO-O <sub>2</sub> /NH <sub>3</sub> monitored ex situ by XRD (Figure S4).                                          | S5   |
| Powder patterns of GZNO-O <sub>2</sub> /NH <sub>3</sub> particles obtained from various nitridation times (Figure S5)                                                 | S6   |
| XPS spectra of GZNO particles (Figure S6)                                                                                                                             | S7-8 |
| Zn fraction in GZNO samples as determined by ICP-OES and XPS elemental analysis (Table S2)                                                                            | S8   |
| XRD patterns of GZNO obtained from the nitridation of ZnGa-LDH (Figure S7)                                                                                            | S9   |
| Reliability values for Pawley refinements fitted to synchrotron GZNO-NH <sub>3</sub> data comparing the relevance of each anisotropic broadening parameter (Table S4) | S10  |
| References                                                                                                                                                            | S10  |

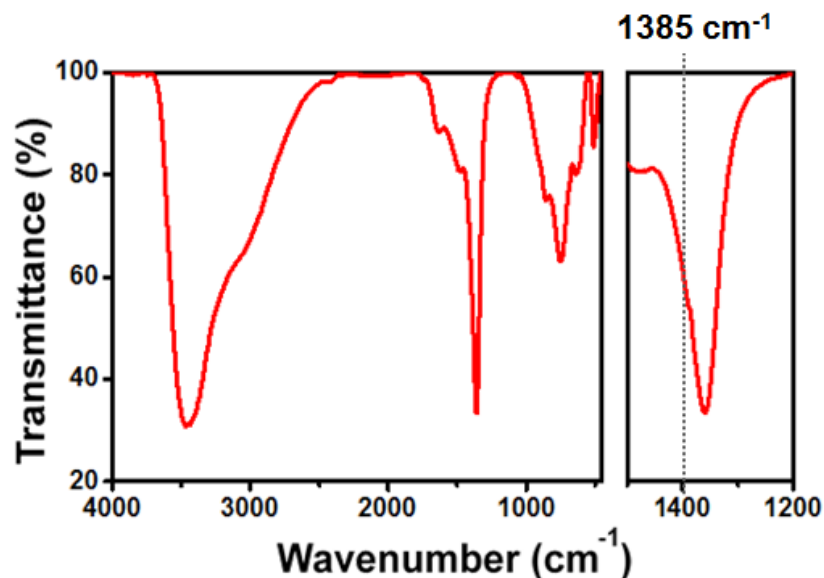

**Figure S1.** FTIR spectrum of ZnGa-LDH plates. The right panel is a zoom-in view highlighting the carbonate anion stretching mode and the absence of an N-O stretch ( $1385\text{ cm}^{-1}$ ).

**Table S1.** Assignment of the main IR vibration modes of ZnGa-LDH.

| Vibration Modes     | Resonance Frequency ( $\text{cm}^{-1}$ ) |
|---------------------|------------------------------------------|
| $\nu[\text{O-H}]$   | 3446                                     |
| $\nu[\text{H-O-H}]$ | 1637                                     |
| $\nu[\text{N-O}]$   | (1385)                                   |
| $\nu[\text{C-O}]_s$ | 1358                                     |
| $\nu[\text{M-O}]$   | 735                                      |

The ZnGa-LDH sample displays a strong absorption with a broad profile in the  $3490\text{-}3440\text{ cm}^{-1}$  region, associated with the presence of H-bonding interactions between the interlamellar water molecules and the OH functional groups of the hydroxide-based layers.<sup>1</sup> Absorption at the lower wavenumbers between  $740\text{-}485\text{ cm}^{-1}$  is attributed to the vibrational modes associated with the  $\text{M}(\text{OH})_6$  complexes.<sup>2</sup> More specifically, the carbonate species intercalated between the hydroxide layers show a strong intensity band at ca.  $1358\text{ cm}^{-1}$ , which is typical for the carbonate's  $\nu_3$  stretching mode.<sup>3</sup> As can be seen in the zoom-in view of the spectra, no band at  $1385\text{ cm}^{-1}$ , corresponding to the nitrate's  $\nu_3$  stretching mode can be observed.<sup>4</sup>

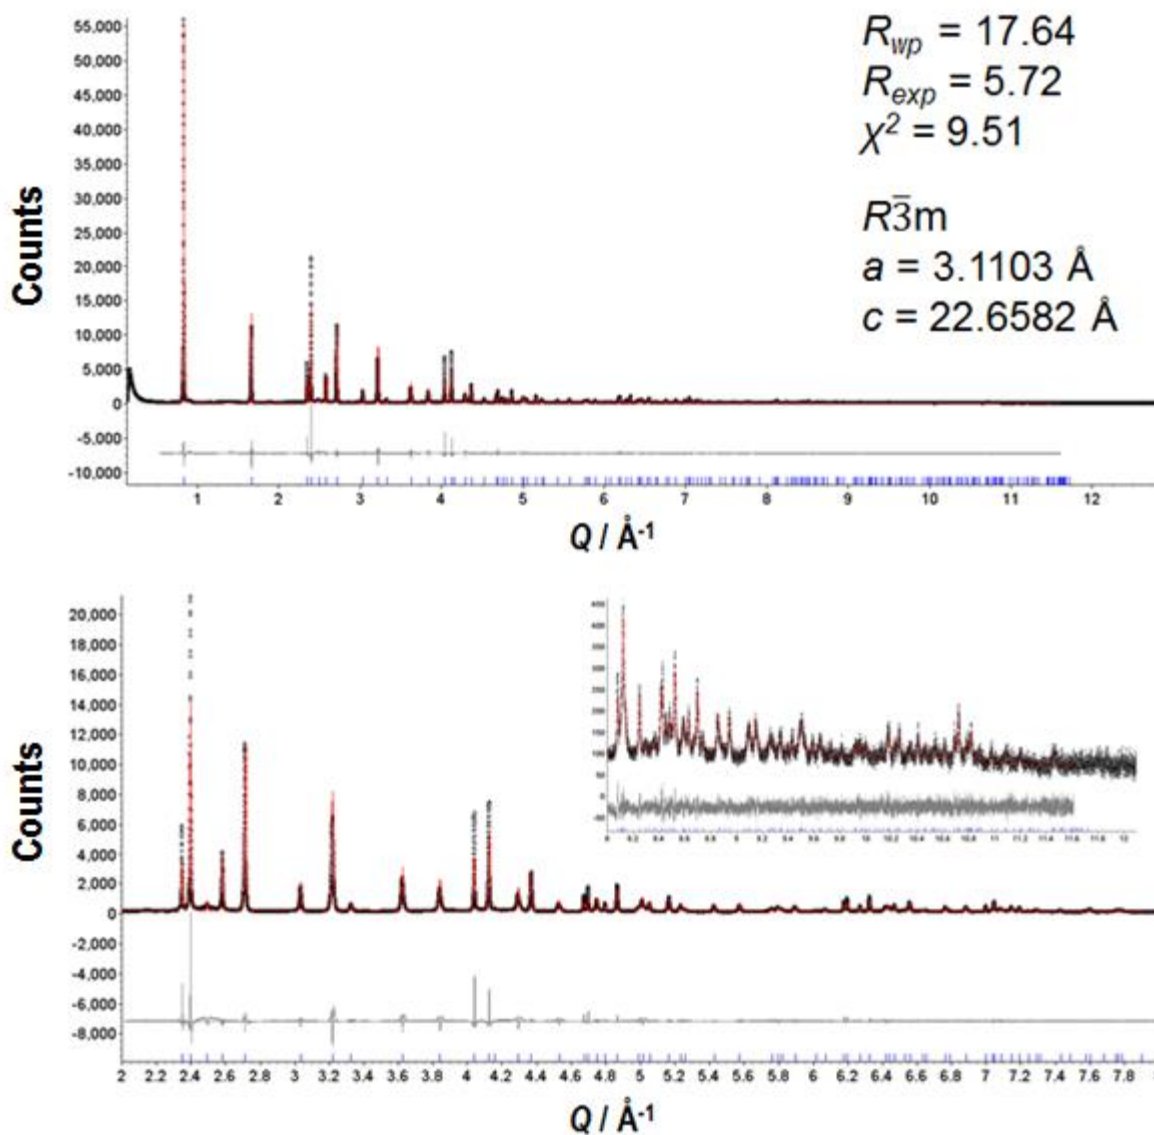

**Figure S2.** Pawley refinement of ZnGa-LDH high resolution synchrotron XRD data. Whole powder pattern (a),  $Q$ -range 2-8  $\text{\AA}^{-1}$  (b), and  $Q$ -range 8-12.1  $\text{\AA}^{-1}$  (b, inset), respectively. Markers represent experimental data, while the solid red lines indicate the calculated pattern. The difference pattern is shown in gray below the experimental and calculated patterns. The high- $Q$  region of the powder pattern is shown in the inset.

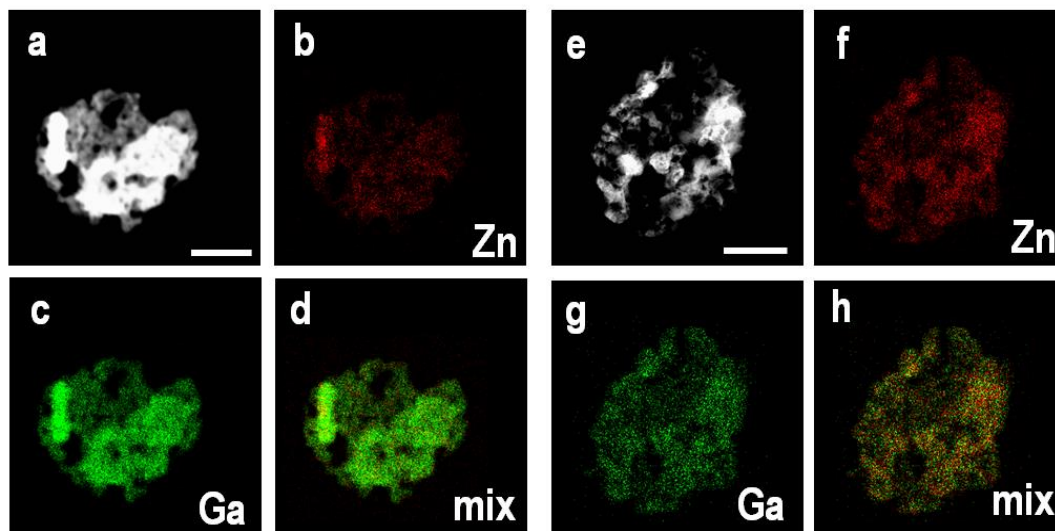

**Figure S3.** STEM micrographs/EDS-mapping of GZNO-NH<sub>3</sub> (a-d) and GZNO-O<sub>2</sub>/NH<sub>3</sub> (e-h).

Scale bars = 200 nm.

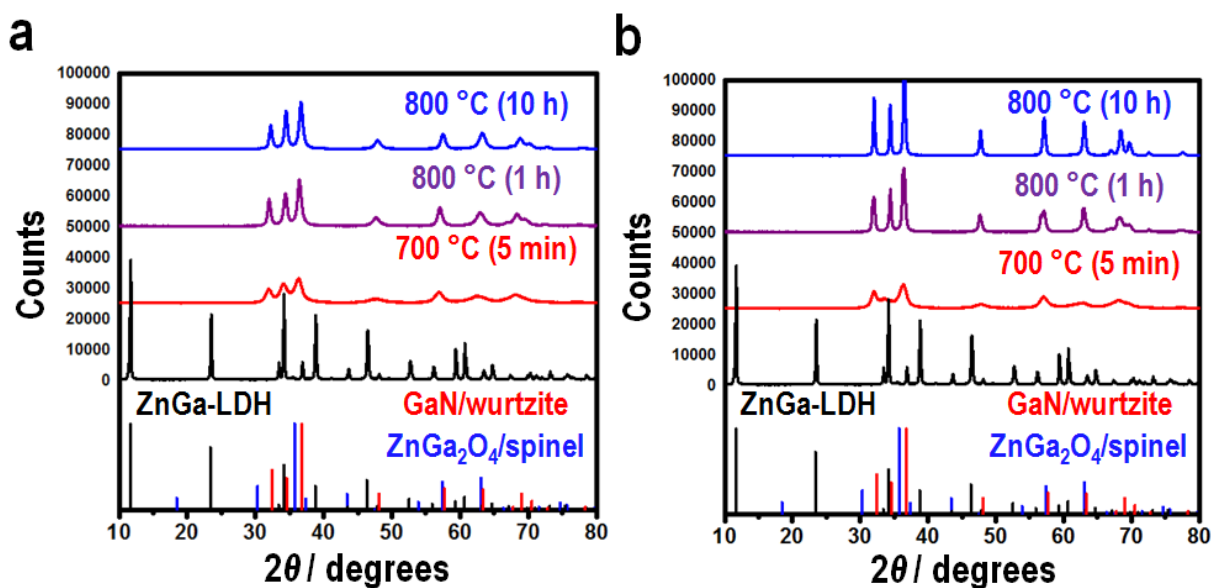

**Figure S4.** Reaction time studies monitored ex situ by XRD. Powder patterns of the set of reactions for GZNO-NH<sub>3</sub> (a) and GZNO-O<sub>2</sub>/NH<sub>3</sub> (b). The data sets are identical to those shown in Figure 2, but left uncropped to show the entire range of 10-80 °2θ. The black patterns corresponds to the precursor ZnGa-LDH while the red and blue pattern belongs to particles that were quenched at 700 °C (red) and 800 °C after 1 h (purple), respectively. The blue pattern corresponds to GZNO and GZNO-O<sub>2</sub> particles that were nitridated for 10 h. Reference patterns were obtained from ICDD PDF No. 01-076-3644, ICDD PDF No. 01-071-0843, and ICDD PDF No. 01-070-2546 which corresponds to rhombohedral-phase ZnGa-LDH phase (black), spinel ZnGa<sub>2</sub>O<sub>4</sub> phase (blue), and hexagonal wurtzite GaN (red), respectively.

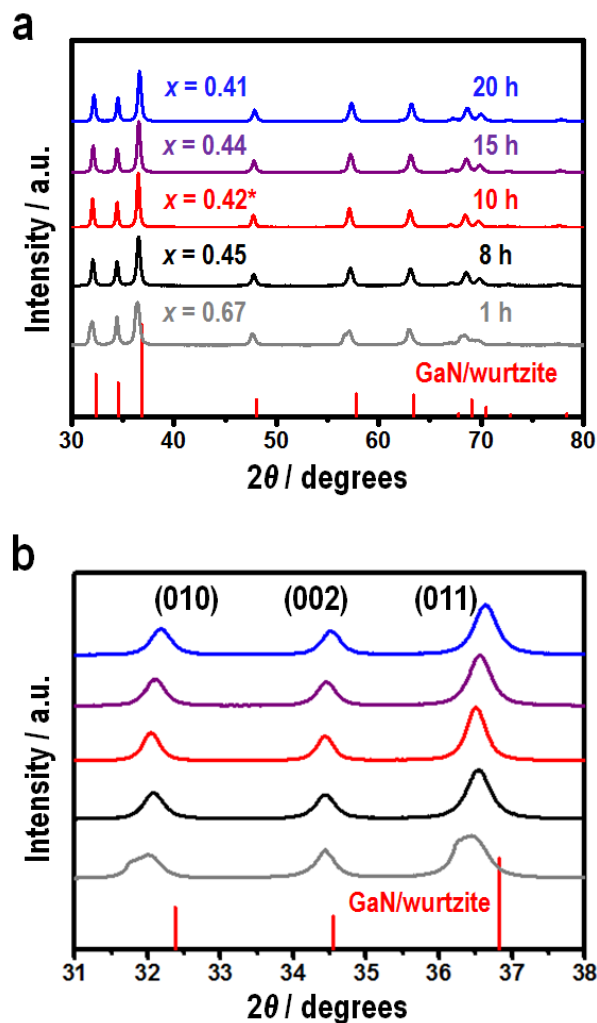

**Figure S5.** Powder patterns of GZNO-O<sub>2</sub>/NH<sub>3</sub> particles obtained from various nitridation times. Powder patterns consisting of the predominant  $hkl$  reflections are shown in (a), while a narrow 30-40 °  $2\theta$  range is shown in panel (b). The hexagonal wurtzite GaN (red) reference pattern was obtained from ICDD PDF No. 01-070-2546. Zn fractions ( $x$ ) obtained from SEM-EDS analysis and reaction times are displayed above the corresponding pattern. \*Fraction calculated from data obtained from ICP-OES analysis.

**a**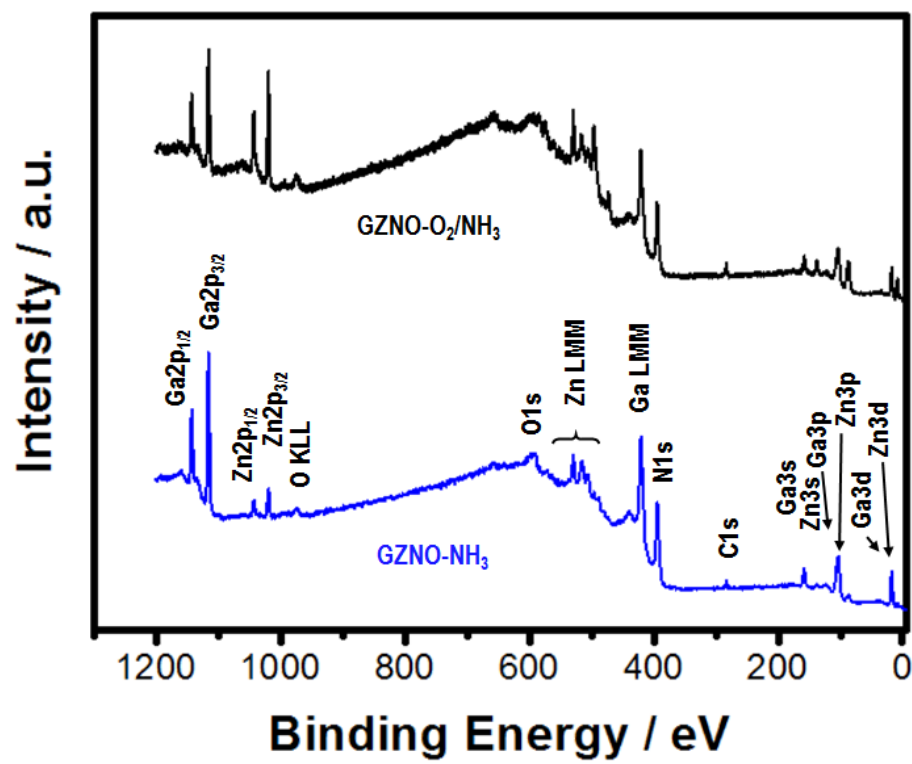**b**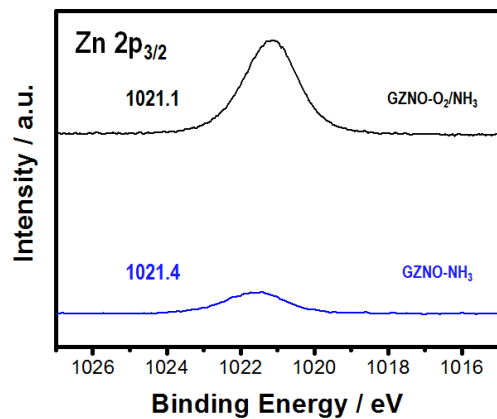**c**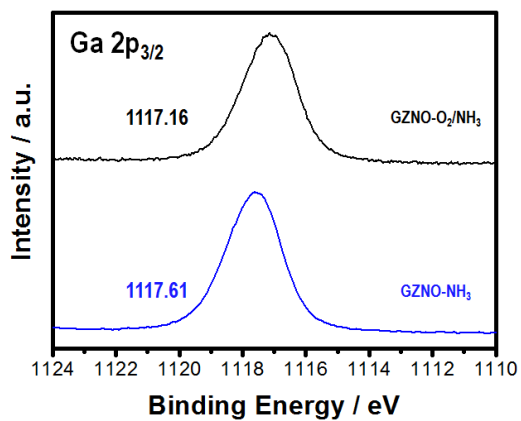

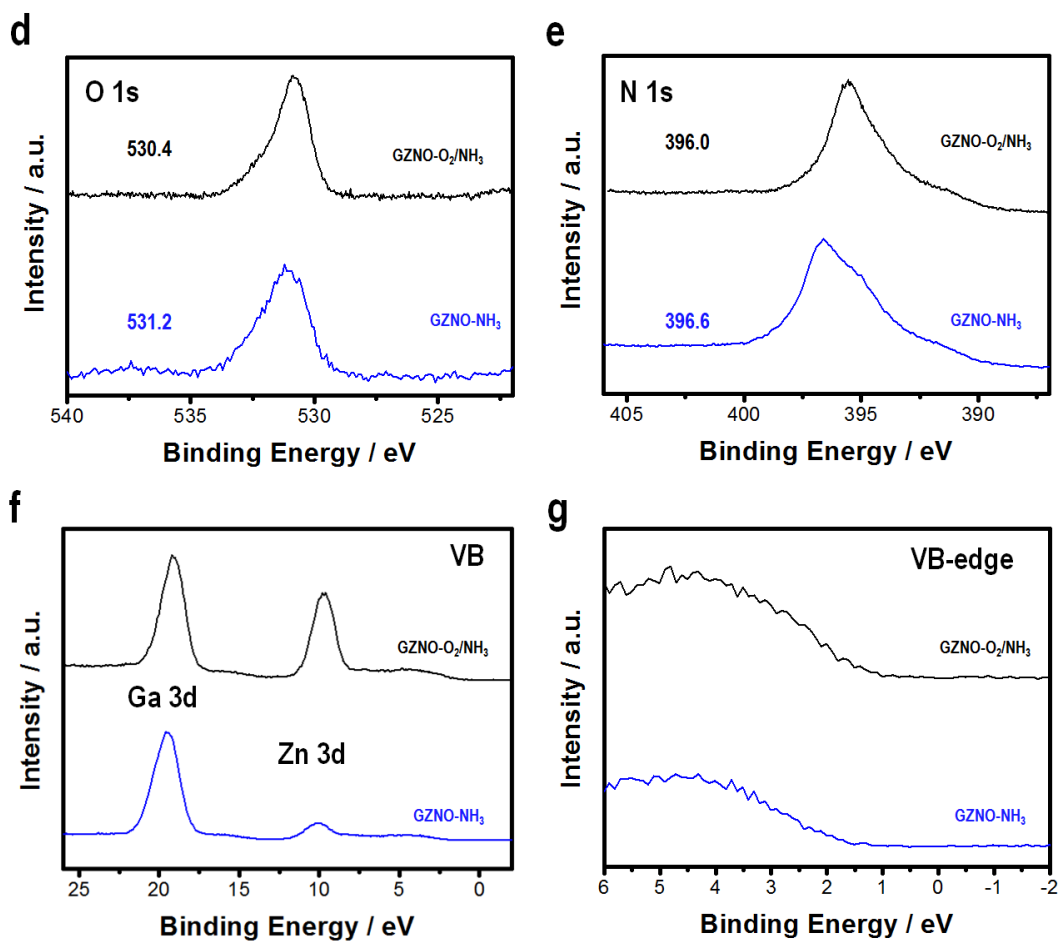

**Figure S6.** XPS spectra of GZNO particles. Survey scan (a) of GZNO-NH<sub>3</sub> (blue), GZNO-O<sub>2</sub>/NH<sub>3</sub> (black), and GZNO-O<sub>2</sub>/NH<sub>3</sub>/ZnO (red). High resolution scans of the Zn2p (b), Ga2p (c), O1s (d), and N1s (e) lines were obtained. The valence band (VB) region and the VB-edge are shown in panels (f) and (g), respectively.

**Table S2.** Zn fraction in GZNO samples as determined by ICP-OES and XPS elemental analysis.

| Sample ID                            | Starting Material | ICP-OES Zn/(Zn+Ga) | XPS Zn/(Zn+Ga) |
|--------------------------------------|-------------------|--------------------|----------------|
| GZNO-NH <sub>3</sub>                 | ZnGa-LDH          | 0.23               | 0.14           |
| GZNO-O <sub>2</sub> /NH <sub>3</sub> | ZnGa-LDH          | 0.42               | 0.42           |



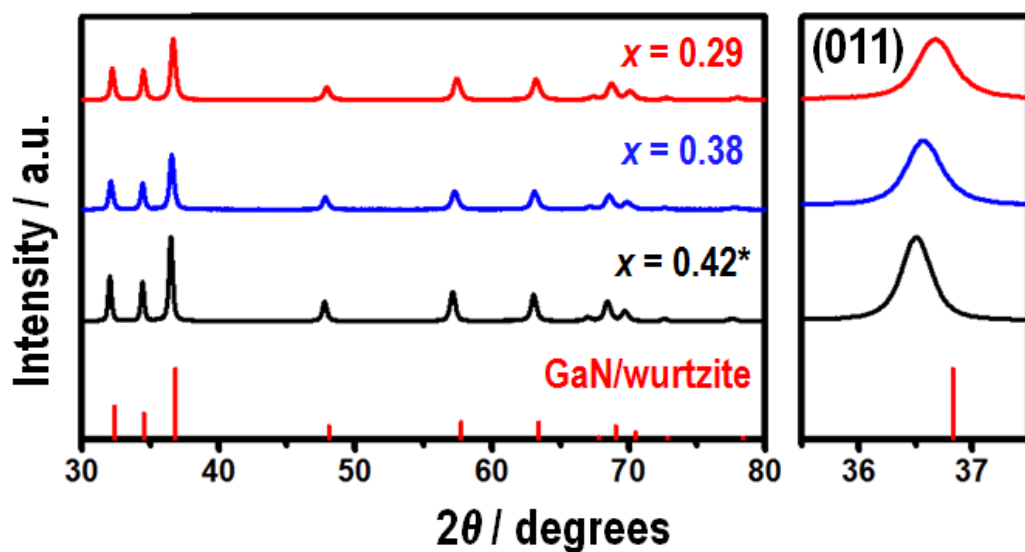

**Figure S7.** XRD patterns of GZNO obtained from the nitridation of ZnGa-LDH. The black and red patterns represents GZNO-O<sub>2</sub>/NH<sub>3</sub> and GZNO-O<sub>2</sub>/NH<sub>3</sub> calcined at 800 °C under NH<sub>3</sub> for 5 h. The blue pattern correspond to ZnGa-LDH reacted sequentially with O<sub>2</sub>/NH<sub>3</sub> for 10 h and NH<sub>3</sub> for 5 h. Zn fractions ( $x$ ) obtained from SEM-EDS or ICP-OES (\*) analysis.

**Table S1.** Reliability values for Pawley refinements fitted to synchrotron GZNO-NH<sub>3</sub> data with each anisotropic broadening parameters<sup>5</sup> in turn was fixed at zero while the others were refined.

| <b>Anisotropic<br/>Broadening<br/>Parameter</b> | <b><math>R_{wp}</math></b> | <b><math>R_{exp}</math></b> | <b><math>\chi^2</math></b> |
|-------------------------------------------------|----------------------------|-----------------------------|----------------------------|
| $S_{400}$                                       | 11.295                     | 7.044                       | 2.571188                   |
| $S_{202}$                                       | 11.953                     | 7.044                       | 2.879487                   |
| $S_{004}$                                       | 9.599                      | 7.044                       | 1.857006                   |
| $\eta$                                          | 9.474                      | 7.044                       | 1.808956                   |
| all used                                        | 7.93                       | 7.044                       | 1.267876                   |

  

| <b>Refined Anisotropic Broadening Parameters</b> |                             |                             |                          |
|--------------------------------------------------|-----------------------------|-----------------------------|--------------------------|
| <b><math>S_{400}</math></b>                      | <b><math>S_{202}</math></b> | <b><math>S_{004}</math></b> | <b><math>\eta</math></b> |
| $16.4 \times 10^4$                               | $16.4 \times 10^4$          | $7.8 \times 10^4$           | 0.49                     |

## References

1. Ulibarri, M. A.; Hernandez, M. J.; Cornejo, J., Hydrotalcite-like compounds obtained by anion exchange reactions. *J. Mater. Sci.* **1991**, *26*, 1512-1516.
2. Busca, G.; Trifiro, F.; Vaccari, A., Characterization and Catalytic Activity of Cobalt-Chromium Mixed Oxides. *Langmuir* **1990**, *6*, 1440-1447.
3. Hernandez-Moreno, M. J.; Ulibarri, M. A.; Rendon, J. L.; Serna, C., IR characteristics of hydrotalcite-like compounds. *J. Phys. Chem. Miner.* **1985**, *12*, 34-38.
4. Kruissink, E. C. ; Vanreijen, L. L.; Ross, J. R. H., Coprecipitated nickel-alumina catalysts for methanation at high temperature. Part 1.-Chemical composition and structure of the precipitates. *J. Chem. Soc., Faraday Trans.* **1981**, *77*, 649-663.
5. Stephens, P. W., Phenomenological model of anisotropic peak broadening in powder diffraction. *J. Appl. Cryst.* **1999**, *32* (2), 281-289.
